# Supplementary material for: The Effect of Diabetes Mellitus Type 1 on the Energy Metabolism of Hepatocytes: Multiphoton Microscopy and Fluorescence Lifetime Imaging
Source: MDPI journal article supplement (doi:10.3390/ijms242317016), 2023-11-30
Supplement: s1 [file s1]

# Supplementary Materials

## The Effect of Diabetes Mellitus Type 1 on the Energy Metabolism of Hepatocytes: Multiphoton Microscopy and Fluorescence Lifetime Imaging

Svetlana Rodimova <sup>1</sup>, Nikolai Bobrov <sup>2</sup>, Artem Mozherov <sup>1,2</sup>, Vadim Elagin <sup>1</sup>, Maria Karabut <sup>1</sup>, Polina Ermakova <sup>1</sup>, Ilya Shchechkin <sup>1,3</sup>, Dmitry Kozlov <sup>1,3</sup>, Dmitry Krylov <sup>1,3</sup>, Alena Gavrina <sup>1,3</sup>, Aleksandra Kashina <sup>1</sup>, Vladimir Zagai-nov <sup>2,4</sup>, Elena Zagaynova <sup>1,5</sup> and Daria Kuznetsova <sup>1,3,\*</sup>

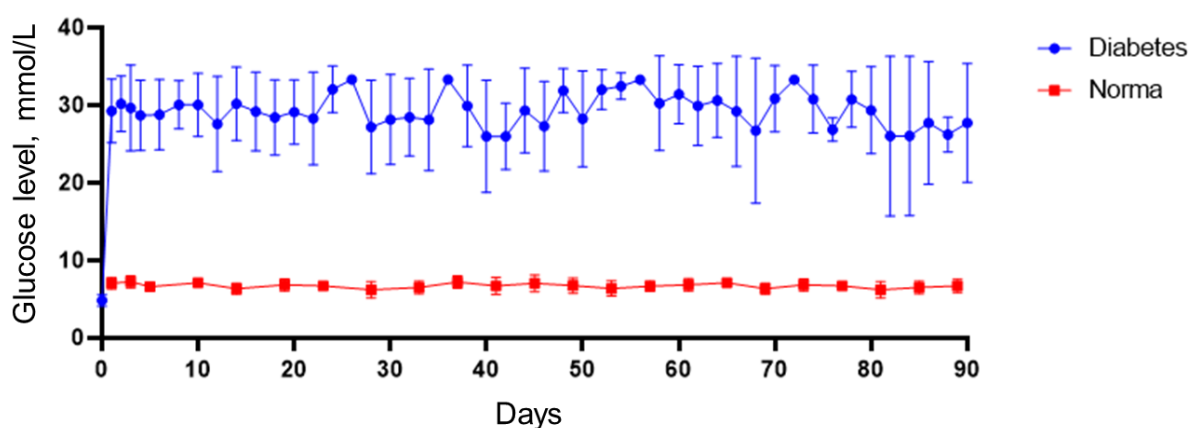

**Figure S1.** Dynamics of changes in glucose levels in rats during the development of diabetes mellitus type 1 following 30% or 70% PH.

**Table S1.** Fluorescence lifetime values of the bound form of NADH (t2) and NADPH (t3) in hepatocytes.

| 30 % PH             | Normal regeneration |          |         | Diabetes Mellitus |           |           |
|---------------------|---------------------|----------|---------|-------------------|-----------|-----------|
|                     | t2, ps              | t3, ps   | tm, ps  | t2, ps            | t3, ps    | tm, ps    |
| 0 day               | 2276±101            | 4105±317 | 1276±39 | 1846±216*         | 5035±370* | 1035±229* |
| 3 <sup>rd</sup> day | 2194±113            | 4130±421 | 1387±43 | 1975±179          | 3960±371  | 1071±219* |
| 7 <sup>th</sup> day | 2094±96             | 3861±276 | 1312±55 | 1956±171          | 4033±297  | 1038±185* |

  

| 70 % PH             | Normal regeneration |          |         | Diabetes Mellitus |           |           |
|---------------------|---------------------|----------|---------|-------------------|-----------|-----------|
|                     | t2, ps              | t3, ps   | tm, ps  | t2, ps            | t3, ps    | tm, ps    |
| 0 day               | 2276±101            | 4105±317 | 1276±39 | 1699±228*         | 4895±381* | 1002±110* |
| 3 <sup>rd</sup> day | 2194±113            | 4130±421 | 1387±43 | 1683±223*         | 4999±356* | 1160±23*  |
| 7 <sup>th</sup> day | 2094±96             | 3861±276 | 1312±55 | 1639±184*         | 5349±211* | 1110±20*  |

\*—statistically significant differences compared to the corresponding time point for normal re-generation

**Table S2.** The primer sequences for RT-PCR.

| Primer Target | Primer Sequence                                              |
|---------------|--------------------------------------------------------------|
| CYP2E1        | F: AGGCTGTCAAGGAGGTGCTACT<br>R: AAAACCTCCGCACGTCCTTCCA       |
| SREBPf1       | F: GCTCACAAAAGCAAATCACT<br>R: GCGTTTCTACCACTTCAGG            |
| Acaca         | F: GCGGCTCTGGAGGTATATGT<br>R: TTAGCGTGGGGATGTTCCCT           |
| SIRT1         | F: GGATCATTCAGTGTCATGGTTC<br>R: AGGACACCGAGGAACTACCTG        |
| HGF           | F: TTGCCCTATTTCCCGTTGTGA<br>R: ACCATCCACCCTACTGTTGT          |
| UCP2          | F: TCTCCCAATGTTGCCCCGAAA<br>R: CAAGGGAGGTCGTCTGTCAT          |
| Mlxipl        | F: AATGGGATGGTGTCTACCGC<br>R: GAATTCAGGACAGTTGGCCG           |
| TNFR1         | F: CCAAGTGCCACAAAGGAACC<br>R: CCGACATGTCTTGCAACTGAG          |
| PPARa         | F: GACTAGCAACAATCCGCCTTT<br>R: GCCTCCTTGTTTTCAACGCC          |
| CYP7A1        | F: CTGCCGGTACTAGACAGCATC<br>R: CCGTCCTCAAGATGGAGAGTG         |
| CAT           | F: GCTCCGCAATCCTACACCAT<br>R: GGACATCGGGTTTCTGAGGG           |
| SREBPf2       | F: CGCCCTTCAAGTACCAACCC<br>R: CTCCTTCTTTGGGAGGCTCG           |
| Nr1h3         | F: CGACTTCGAGTCACGCCTTG<br>R: AGGGAGCTGTTTGGCAAAGT           |
| il6R          | F: AAGCAGGTCCAGCCACAATGTAG<br>R: CCAACTGACTTTGAGCCAACGAG     |
| HPRT          | F: CTCATGGACTGATTATGGACAGGAC<br>R: GCAGGTCAGCAAAGAACTTATAGCC |
| IPO8          | F: GTGGAGTTCCTGTGCGTC<br>R: ACGAATCTGCTGCCGGTCAT             |
| Gusb          | F: CCGTGGAACAGGGAATGAG<br>R: CTCAGGTGTTGTCATCGTCA            |
| B2M           | F: CGAGACCGATGTATATGCTTGC<br>R: GTCCAGATGATTCAGAGCTCCA       |
| Ywhaz         | F: GATGAAGCCATTGCTGAACTTG<br>R: GTCTCCTTGGGTATCCGATGTC       |

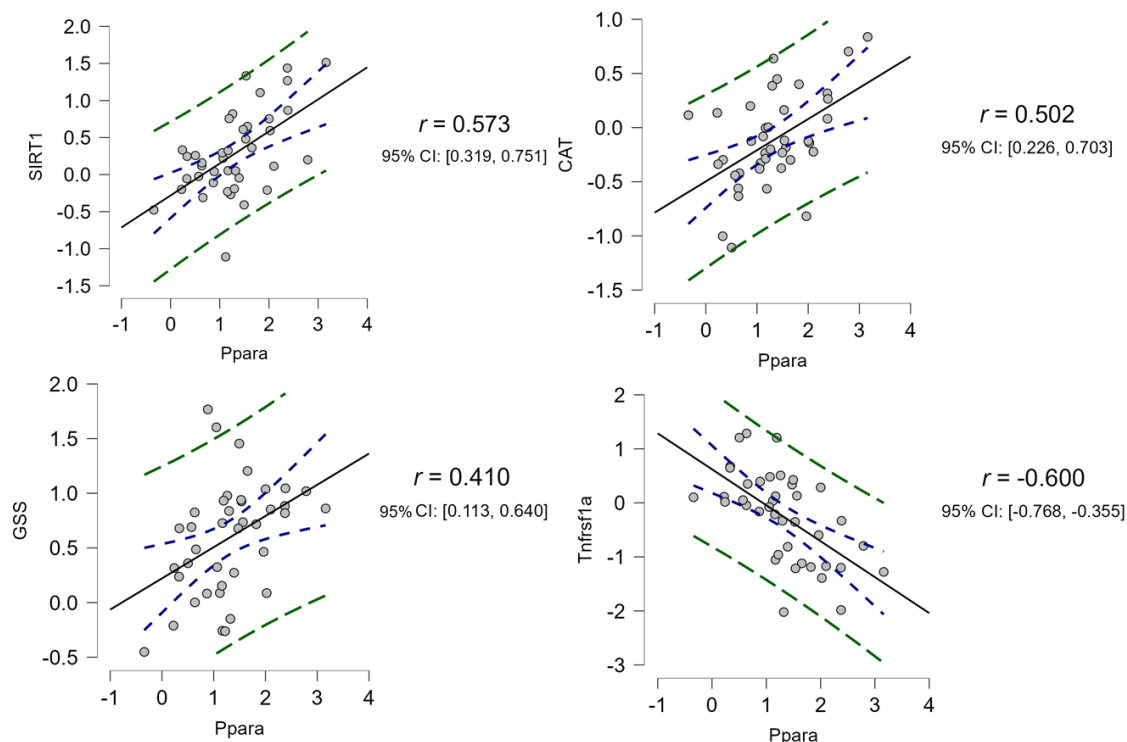

**Figure S2.** Scatter plot of correlation of genes expression with confidence interval and trend line, Pearson's  $r$  and 95% confidence interval.

#### *The goodness of fit model assessment*

Goodness of fit model was evaluated on the basis of  $\chi^2$  values, which were in the range of 0.9–1.2. Figures showing the typical tri-exponential fitting and fluorescence decay of NAD(P)H.

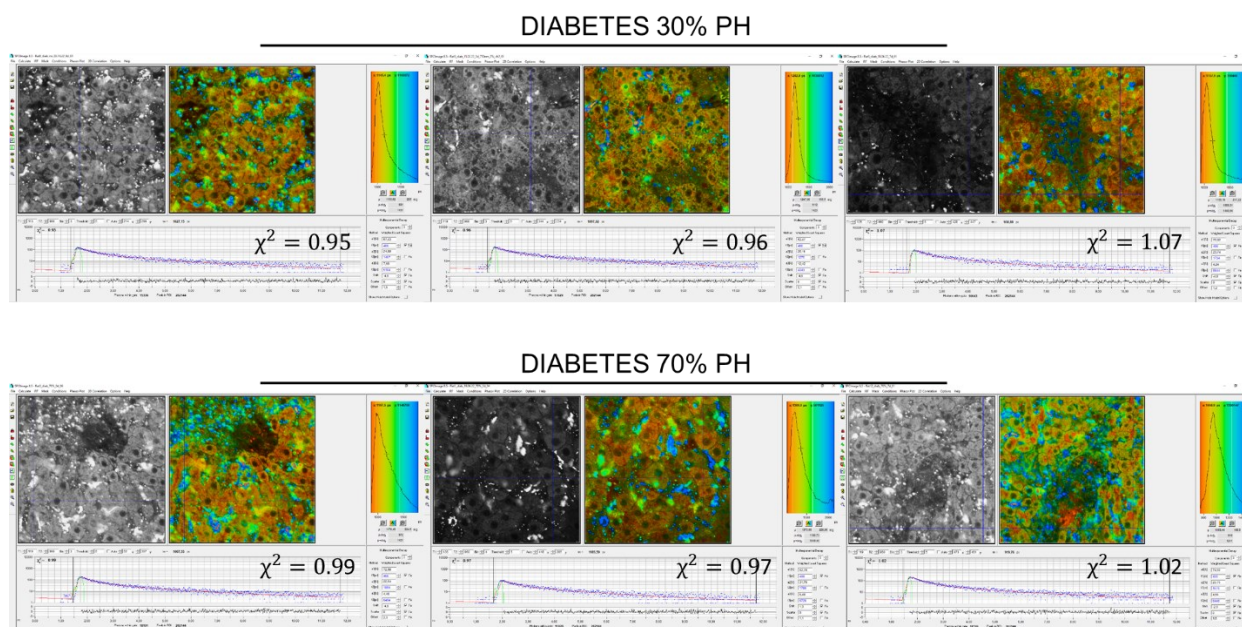

**Figure S3.** Image of typical tri-exponential fitting and fluorescence decay of NAD(P)H. The images were obtained using SPCImage software. The values of the goodness of the fit have been enlarged and placed on the right side of each image.
